# Supplementary material
Source: publisher site journal article supplement (https://www.spandidos-publications.com/3270/downloadSupplementary)

Figure S1. Cell cycle and apoptosis analysis following miR-433 overexpression and knockdown. Flow cytometric analysis showed that miR-433 regulated the cell cycle in (A) A549 and (B) H1299 cells. Flow cytometric assay showed that miR-433 regulated apoptosis in (C) A549 and (D) H1299 cells. miR, microRNA; NC, negative control; ASO, antisense oligonucleotide.

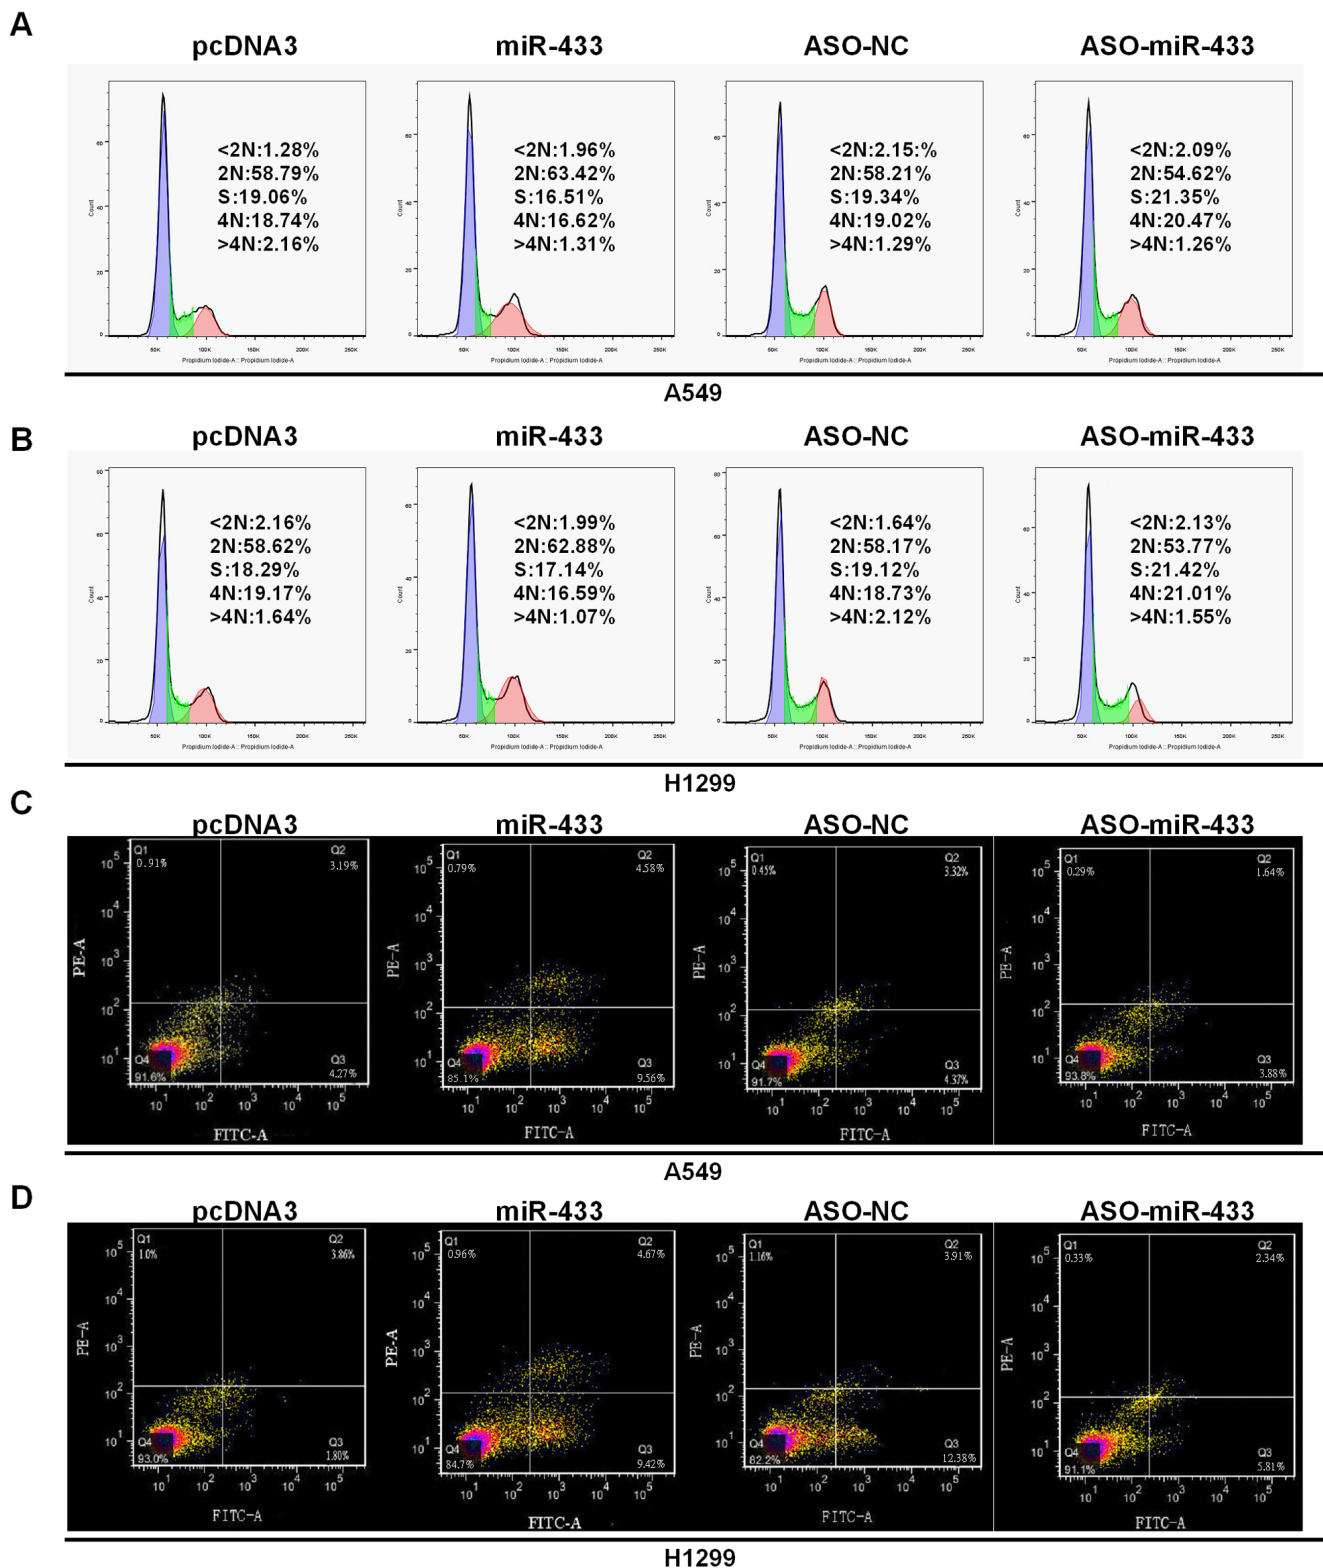

Figure S2. Cell cycle and cell apoptosis analysis following TMED5 overexpression. Flow cytometric analysis showed that TMED5 overexpression regulated the cell cycle in (A) A549 and (B) H1299 cells. (C) Flow cytometric assay showed that TMED5 overexpression regulated apoptosis in A549 and H1299 cells. p, plasmid; TMED5, transmembrane p24 trafficking protein 5.

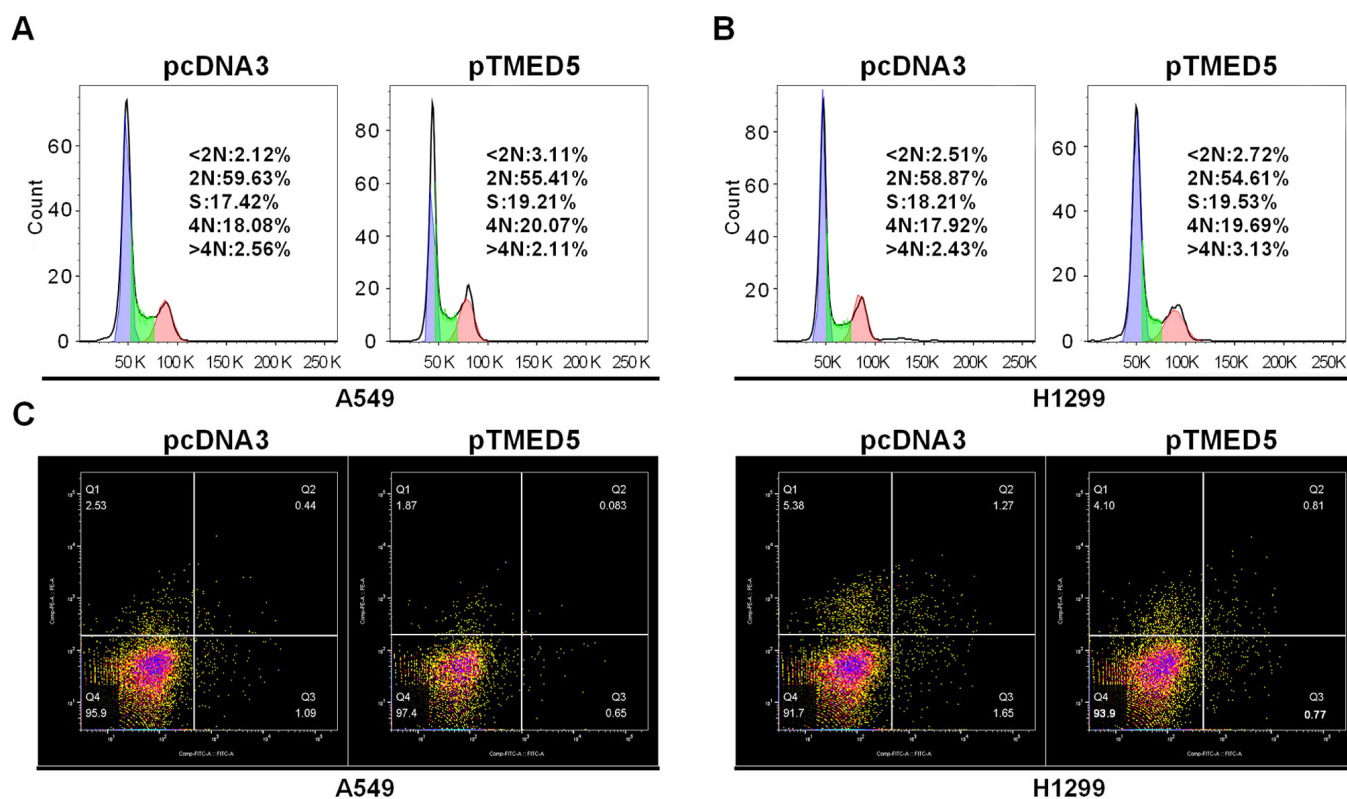

Supplement: Supplementary file 1 [file downloadSupplementary]
